# Supplementary material for: A reactive electrochemical filter system with an excellent penetration flux porous Ti/SnO2–Sb filter for efficient contaminant removal from water
Source: Royal Society of Chemistry journal article supplement (doi:10.1039/c8ra00603b), 2018-01-01
Supplement: c8ra00603b1.pdf [file c8ra00603b1.pdf]

**Supporting Information for:**

**Reactive Electrochemical Filter System with an Excellent  
Penetration Flux Porous Ti/SnO<sub>2</sub>-Sb Filter for Efficient  
Contaminant Removal from Waters**

*Kui Yang<sup>a, b</sup>, Hui Lin<sup>b\*</sup>, Shangtao Liang<sup>c</sup>, Ruzhen Xie<sup>d</sup>, Sihao Lv<sup>b</sup>, Junfeng Niu<sup>b</sup>, Jie*

*Chen<sup>b</sup>, Yongyou Hu<sup>a, e\*</sup>*

<sup>a</sup> School of Environment and Energy, South China University of Technology,

Guangzhou 510006, P.R. China

<sup>b</sup> School of Environment and Civil Engineering, Dongguan University of Technology,

Dongguan 523808, P.R. China

<sup>c</sup> AECOM Inc., Environment, Atlanta, Georgia 30309, United States

<sup>d</sup> College of Architecture and Environment, Sichuan University, Chengdu 610065,

P.R. China

<sup>e</sup> The Key Lab of Pollution Control and Ecosystem Restoration in Industry Clusters,

Ministry of Education, South China University of Technology, Guangzhou Higher

Education Mega Centre, Guangzhou, 510006, PR China

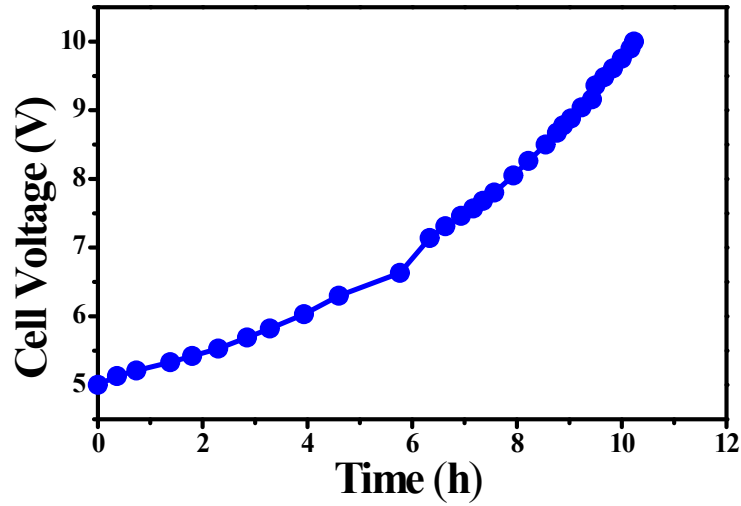

**Fig. S1** Cell potential variation with time in accelerated life tested performed in 0.5 M H<sub>2</sub>SO<sub>4</sub> solution under 1 A cm<sup>-2</sup> at 25 °C.

**Table S1** Comparison of the service life of different Ti/SnO<sub>2</sub>-Sb electrodes in the literature

|                           | Current density<br>(A cm <sup>-2</sup> ) | Accelerated service<br>life (h) | Actual service life (year)<br>(under 10 mA cm <sup>-2</sup> ) |
|---------------------------|------------------------------------------|---------------------------------|---------------------------------------------------------------|
| Our study                 | 0.5                                      | 10.23                           | 2.92                                                          |
| Sun et al. <sup>1</sup>   | 0.5                                      | 2                               | 0.57                                                          |
| Yang et al. <sup>2</sup>  | 0.1                                      | 100                             | 1.14                                                          |
| Wang et al. <sup>3</sup>  | 0.1                                      | 160                             | 1.83                                                          |
| Zhang et al. <sup>4</sup> | 1                                        | 0.95                            | 1.08                                                          |

#### **Text. S1-The calculation details of mass transfer performance**

At sufficiently high anodic potentials, the limiting anodic current density ( $I_{\text{lim}}$ ) can be described by the following equation:<sup>5</sup>

$$I_{\text{lim}} = \frac{D_{\text{Fe(CN)}_6^{3-}} z F}{2\delta} C_b = k_d C_b \quad (\text{S1})$$

where  $D_{\text{Fe(CN)}_6^{3-}}$  is the diffusion coefficient for Fe(CN)<sub>6</sub><sup>3-</sup> (m s<sup>-1</sup>),  $z = 1$  is the number of electrons transferred for Fe(CN)<sub>6</sub><sup>4-</sup> oxidation,  $F$  is the Faraday constant (96485 C mol<sup>-1</sup>),  $\delta$  is the boundary layer thickness (m), and  $C_b$  is the bulk concentration of Fe(CN)<sub>6</sub><sup>4-</sup> (mol m<sup>-3</sup>). Thus, the observed rate constant ( $k_{\text{obs}}$ , m s<sup>-1</sup>) for Fe(CN)<sub>6</sub><sup>4-</sup>

oxidation at the reactive electrochemical filter system was determined using the limiting current approach,<sup>6, 7</sup> and the  $k_{\text{obs}}$  was calculated by the following equation:

$$k_{\text{obs}} = \frac{I_{\text{lim}}}{zFAC_b} \quad (\text{S2})$$

where  $A$  is the anode geometric surface area ( $\text{m}^2$ ). However, the measured  $I_{\text{lim}}$  by electrochemical station also contains other streams such as charging current and cause an overestimation of  $k_{\text{obs}}$ . To measure  $k_{\text{obs}}$  more precisely, additional  $\text{Fe}(\text{CN})_6^{3-}$  oxidation experiments at sufficiently high anodic potentials, which determined by measuring the anodic current density – potentials curves at a scan rate of  $10 \text{ mV s}^{-1}$ , were conducted in a flow-through mode at a constant penetration flux. The  $k_{\text{obs}}$  can be calculated by the following equation.

$$k_{\text{obs}} = 10^{-2} \frac{V \int dC_b}{A \int C_b dt} \quad (\text{S3})$$

where  $V$  is the treatment solution volume ( $\text{m}^3$ ). Based on the measured  $k_{\text{obs}}$  values at various penetration fluxes, a simple model accounts for the competition between kinetics and mass transfer reported by Chaplin was used to fit the  $k_{\text{obs}}$  values (blue line in Fig. 4) by the following equation:<sup>6</sup>

$$k_{\text{obs}} = \frac{k k_m}{k + k_m} \quad (\text{S4})$$

where  $k_m$  is the normalized mass transfer rate constant ( $\text{m s}^{-1}$ ) and it was set equal to  $J$  ( $\text{m s}^{-1}$ ),  $k$  is the normalized kinetic rate constant ( $\text{m s}^{-1}$ ).

## Text S2-The calculation details of electrochemically active surface

Total voltammetric charge ( $q_T^*$ , mC cm<sup>-2</sup>) is the entire electroactive surface of an electrode, which is obtained when the scan rate ( $\nu$ ) tends is approaching zero.<sup>8,9</sup> Specifically,  $q_T^*$  can be obtained by plotting the reciprocal of  $q^*$  against the square root of the potential scan rate (equation S4).

$$(q^*)^{-1} = (q_T^*)^{-1} + k\nu^{1/2} \quad (\text{S4})$$

where  $k$  is a constant. Total voltammetric charge  $q_T^*$  is composed of two fractions, outer voltammetric charge ( $q_O^*$ ) and inner voltammetric charge ( $q_I^*$ ), which represent the charge related to the outer geometric and inner unattainable electrode areas, respectively. Among them,  $q_O^*$  is related to the most accessible electroactive surface area, and can be obtained according to the following equation:

$$q^* = q_O^* + k\nu^{1/2} \quad (\text{S5})$$

Additionally, the ratio between the inner voltammetric charge ( $q_I^*$ , mC cm<sup>-2</sup>) and the total voltammetric charge ( $q_T^*$ , mC cm<sup>-2</sup>) was defined as the electrochemical porosity ( $q_I^*/q_T^*$ , %).<sup>10</sup> And the roughness factor ( $R_f$ ), which was calculated by comparing the determine capacitance of the electrode with the average double-layer capacitance of a smooth oxide surface (60  $\mu\text{F}$ ),<sup>11</sup> was defined the electroactive area per geometrical area.<sup>12</sup>

The  $q_T^*$  and  $q_O^*$  for the porous Ti/SnO<sub>2</sub>-Sb filter are investigated as a function of different scan rates ( $\nu$ ) as presented in Fig. S2(b) and (c), respectively.

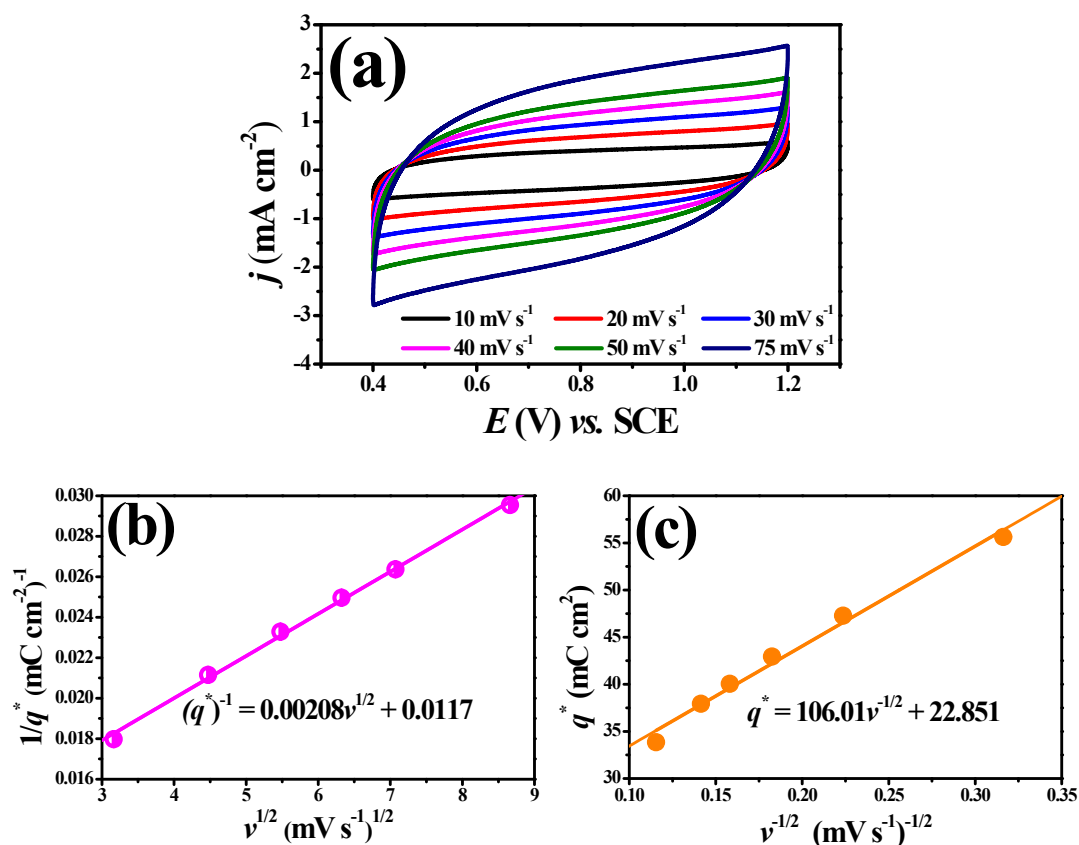

**Fig. S2** (a) CV curves of porous Ti/SnO<sub>2</sub>-Sb filter at different scan rate, penetration flux: 12.3 m<sup>3</sup> m<sup>-2</sup> h<sup>-1</sup>; (b) Reciprocal voltammetric charge vs. the square root of scan rate; (c) Voltammetric charge vs. the reciprocal square root of scan rate.

**Table S2** Total, Outer and Inner charge,  $q_I^*/q_T^*$  and  $R_f$  of the porous Ti/SnO<sub>2</sub>-Sb filter

| $q_T^*/(\text{mC cm}^{-2})$ | $q_O^*/(\text{mC cm}^{-2})$ | $q_I^*/(\text{mC cm}^{-2})$ | $q_I^*/q_T^*(\%)$ | $R_f$             |
|-----------------------------|-----------------------------|-----------------------------|-------------------|-------------------|
| $85.7 \pm 2.2$              | $22.9 \pm 1.4$              | 62.8                        | 73.3%             | $1428.2 \pm 37.2$ |

**Table S3** Comparison of mass transfer performance of different electrode

|                                 | Anode                                   | Standard probing molecule          | Initial concentration (mM) | $k_{\text{obs}}$ (m s <sup>-1</sup> ) | $k$ (m s <sup>-1</sup> ) |
|---------------------------------|-----------------------------------------|------------------------------------|----------------------------|---------------------------------------|--------------------------|
| Our study                       | porous Ti/SnO <sub>2</sub> -Sb filter   | K <sub>4</sub> Fe(CN) <sub>6</sub> | 5                          | $4.35 \times 10^{-4}$                 | $4.7 \times 10^{-4}$     |
| Guo et al. <sup>13</sup>        | TiO <sub>2</sub> magnéli phase membrane | K <sub>4</sub> Fe(CN) <sub>6</sub> | 5                          | $1.4 \times 10^{-4}$                  | $1.7 \times 10^{-4}$     |
| Tsierkezos et al. <sup>14</sup> | CNT filter                              | K <sub>4</sub> Fe(CN) <sub>6</sub> | 1                          | $1 \times 10^{-4}$                    | -                        |
| Li et al. <sup>15</sup>         | Ti/SnO <sub>2</sub> -Sb tubular         | Pyridine                           | 1.3                        | $2.24 \times 10^{-5}$                 | -                        |

**Table S4** Comparison of oxidation performance of different electrode

|                             | Anode                                          | Model pollutant | Initial concentration (mM) | Oxidation (%) | time (t, h) | Oxidation Flux (OF, mol m <sup>-2</sup> h <sup>-1</sup> ) |
|-----------------------------|------------------------------------------------|-----------------|----------------------------|---------------|-------------|-----------------------------------------------------------|
| Our study                   | porous Ti/SnO <sub>2</sub> -Sb filter          | RhB             | 0.10                       | 99%           | 0.25        | 0.044                                                     |
| Liu et al. <sup>16</sup>    | CNT-filter                                     | Tetracycline    | 0.2                        | >99%          | -           | 0.024                                                     |
| Li et al. <sup>15</sup>     | tubular Ti/SnO <sub>2</sub> -Sb                | Pyridine        | 1.3                        | About 99%     | 3           | 0.024                                                     |
| Santos et al. <sup>17</sup> | Porous Ti <sub>4</sub> O <sub>7</sub> membrane | Phenol          | 1                          | About 60%     | 3           | 0.024                                                     |

## References

- 1 Z. Sun, H. Zhang, X. Wei, X. Ma and X. Hu, *J. Solid State Electr.*, 2015, **19**, 2445.
- 2 B. Yang, C. Jiang, G. Yu, Q. Zhuo, S. Deng, J. Wu and H. Zhang, *J. Hazard. Mater.*, 2015, **299**, 417.
- 3 Y. Wang, C. Shen, M. Zhang, B. T. Zhang and Y. G. Yu, *Chem. Eng. J.*, 2016, **296**, 79.
- 4 L. Zhang, L. Xu, J. He and J. Zhang, *Electrochim. Acta*, 2014, **117**, 192.
- 5 J. B. Hiskey and V. M. Sanchez, *J. Appl. Electrochem.*, 1990, **20**, 479.
- 6 L. Guo, Y. Jing and B. P. Chaplin, *Environ. Sci. Technol.*, 2016, **50**, 1428.
- 7 Y. Bessekhoud, R. Brahimi, F. Hamdini and M. Trari, *J. Photoch. Photobio. A.*, **2012**, 248, 15.
- 8 H. Vogt, *Electrochim. Acta*, 1994, **39**, 1981.
- 9 S. Ardizzone, G. Fregonara and S. Trasatti, *Electrochim. Acta*, 1990, **35**, 263.
- 10 D. Rosestolato, R. Amadelli and A. B. Velichenko, *J. Solid. State. Electr.*, 2016, **20**, 1181.
- 11 R. Geng, G. H. Zhao, M. C. Liu and Y. Z. Lei, *Acta Phys-chim. Sin.*, 2010, **26**, 1493.
- 12 W. Zhang, H. Kong, H. Lin, H. Lu, W. Huang, J. Yin, Z. Lin and J. Bao, *J. Alloy. Compod.*, 2015, **650**, 705.
- 13 L. Guo, Y. Jing and B. P. Chaplin, *Environ. Sci. Technol.*, 2016, **50**, 1428.
- 14 N. G. Tsierkezos and U. Ritter, *J. Chem. Thermodyn.*, 2012, **54**, 35.
- 15 D. Li, J. Tang, X. Zhou, J. Li, X. Sun, J. Shen, L. Wang and W. Han, *Chemosphere*, 2016, **149**,

49.

- 16 Y. Liu, H. Liu, Z. Zhou, T. Wang, C. N. Ong and C. D. Vecitis, *Environ. Sci. Technol.*, 2015, **49**, 7974.
- 17 M. C. Santos, Y. A. Elabd, J. Yin, B. P. Chaplin and F. Lei, *Aiche J.*, 2016, **62**, 508.
